# Supplementary material for: Myricetin alleviated hepatic steatosis by acting on microRNA-146b/thyroid hormone receptor b pathway in high-fat diet fed C57BL/6J mice
Source: Royal Society of Chemistry journal article supplement (doi:10.1039/c8fo01452c), 2019-01-01
Supplement: c8fo01452c1.pdf [file c8fo01452c1.pdf]

Supplementary information  
Supplementary Figure 1

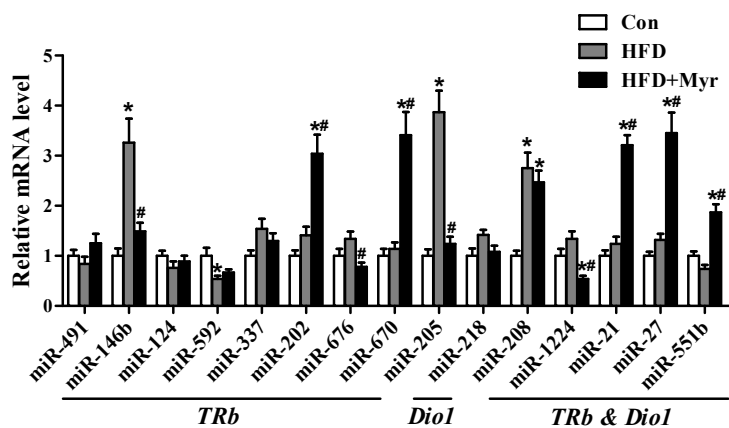

**Fig. S1. Confirmation of the expression of differentially expressed miRNAs selected from next-generation sequencing technology by qRT-PCR.** Data were presented as mean  $\pm$  SEM ( $n = 8$ ) and were statistically analyzed using one-way ANOVA followed by Duncan's multiple-range test. Con, control; HFD, high-fat diet; HFD+Myr, high-fat diet with 100 mg/kg myricetin. \* $P < 0.05$  vs Con; # $P < 0.05$  vs HFD.

## Supplementary Figure 2

A

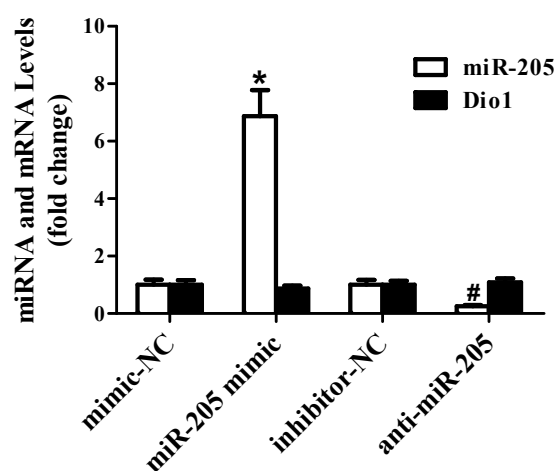

B

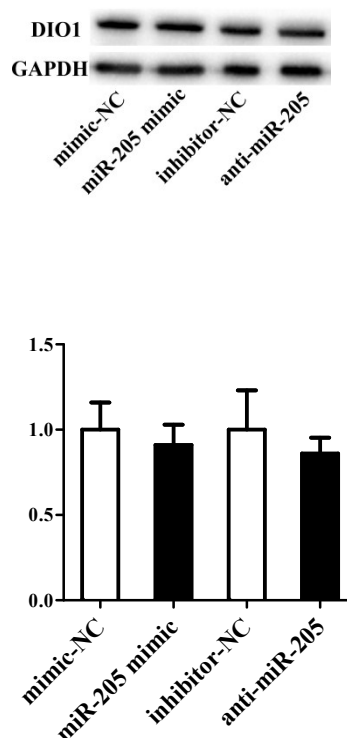

**Fig. S2 miR-205 failed to regulate DIO1 expression in primary mouse hepatocytes.** (A) miR-205 and *Dio1* mRNA levels, and (B) DIO1 protein levels were detected in primary hepatocytes transfected with miR-205 mimic or mimic negative control (mimic-NC) and the miR-205 inhibitor (anti-miR-205) or inhibitor negative control (inhibitor-NC). mRNA levels were detected in primary hepatocytes 24 h after transfection, while protein levels were detected by western blot 48 h after transfection. Mean  $\pm$  SEM shown were representative of at least three independent *in vitro* experiments, Student's *t*-test was used when comparing two groups. \*  $P < 0.05$  vs mimic-NC, #  $P < 0.05$  vs inhibitor-NC.

### Supplementary Figure 3

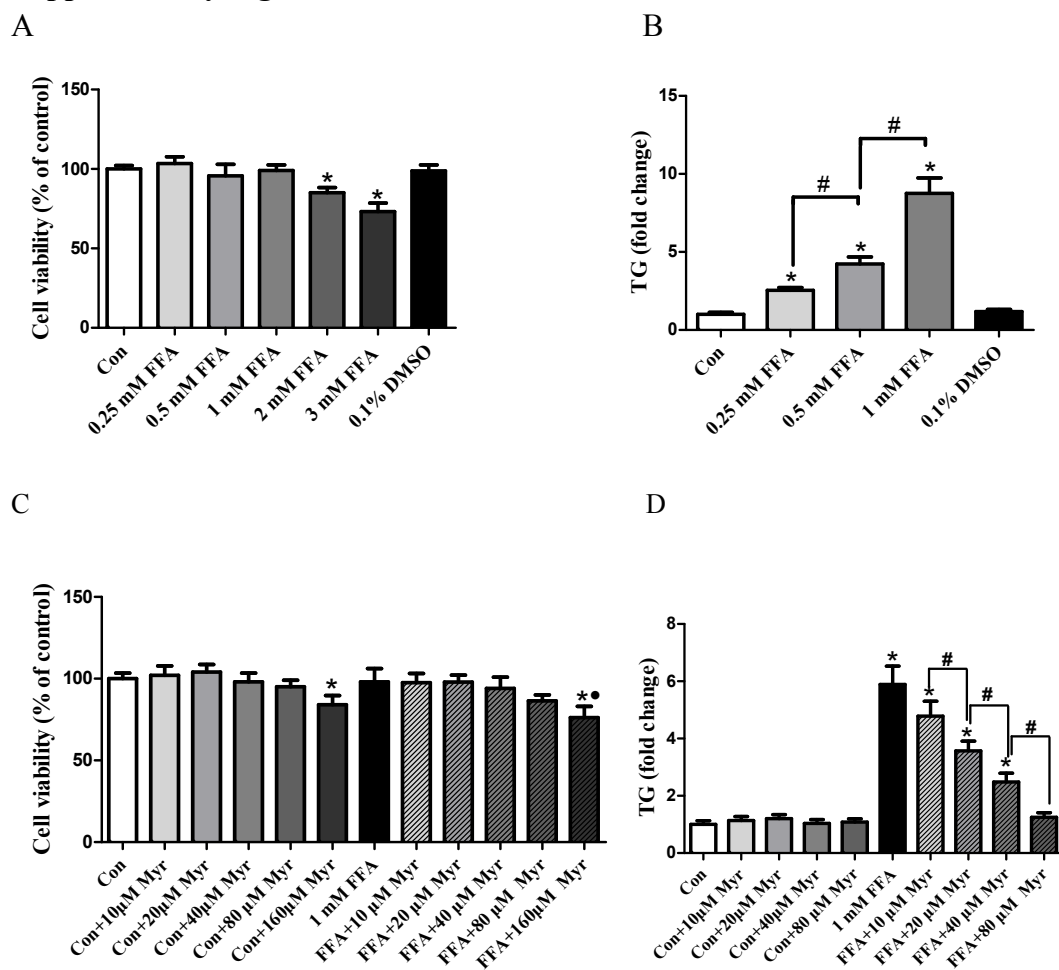

**Fig.S3 Effects of FFA and myricetin on cell viability and lipid accumulation in primary mouse hepatocytes.** Effects of FFA on cellular viability (as % of control) of hepatocytes as measured by MTT assay (A) and lipid accumulation (B). Effects of myricetin on cellular viability (as % of control) of 1 mM FFA treated hepatocytes as measured by MTT assay (C) and lipid deposition (D). All data were from three to five independent experiments performed in duplicate. Results were represented as mean  $\pm$  SEM and were statistically analyzed using Student's *t* test or one-way ANOVA followed by Duncan's multiple-range test. \*  $P < 0.05$  vs. Con group; # $P < 0.05$  between different concentrations of FFA-treated groups in (B) and between different concentrations of myricetin in 1 mM FFA-treated groups in (D); • $P < 0.05$  vs. 1mM FFA-treated group.
